# Supplementary material
Source: publisher figshare collection journal article supplement (https://sage.figshare.com/ndownloader/files/12370934)
Supplement: Supplementary file 1 [file 12370934]

**Supplemental Table 6: Diff gene expression**

| Key Event                                                                                                  | Male CD-1 Mouse                                                                                                                                                                                                                        | Female CD-1 Mouse                                                                                                                                                                                                                                                                                                                                                                                        |
|------------------------------------------------------------------------------------------------------------|----------------------------------------------------------------------------------------------------------------------------------------------------------------------------------------------------------------------------------------|----------------------------------------------------------------------------------------------------------------------------------------------------------------------------------------------------------------------------------------------------------------------------------------------------------------------------------------------------------------------------------------------------------|
| Baseline differences in drug metabolism and transporters, osmotic regulation and oxidative stress handling | <ul style="list-style-type: none"> <li>• Exclusive expression: Cyp2j13, Cyp4a12a, Cyp7b1.</li> <li>• Exclusive expression: Slc7a13, Slco1a1</li> <li>• ↑ ROS generation: Cyp2e1</li> </ul>                                             | <ul style="list-style-type: none"> <li>• ↑ Cyp4a14 and Cyp2d12</li> <li>• ↑ ABC transporters; exclusive expression: Slc17a2, Slc7a12</li> <li>• ↑ Osmotic stress regulation: Aqp4, Aqp2, Ces1d, Cryab, Hspa1b, Hspa2, Prlr, Serpina6</li> <li>• ↑ Glutathione-mediated detoxification: Gsta1, Gsta2 , Gsta4, Gsto1, Mgst1, Gsta3, Gstm2</li> <li>• ↑ Oxidative stress protection: Cbr1, Ephx1</li> </ul> |
| Pharmacology and compound related renal stress<br>(1000 mg/kg/day, Wk 1-4)                                 | <ul style="list-style-type: none"> <li>• ↑ Osmoregulation: Aqp2, Slc6a12</li> <li>• ↑ Lipid metabolism and oxidative stress response: Cyp4a14</li> <li>• ↑ Urea transporter: Slc14A2</li> <li>• ↑ Cell cycle (Wk 4): Cdkn1a</li> </ul> |                                                                                                                                                                                                                                                                                                                                                                                                          |

**Supplemental Table 6: Diff gene expression**

|                                                                            |                                                                                                                                                                                                                                                                                                                                                                                                                                                                                                     |                                                                                                                                               |
|----------------------------------------------------------------------------|-----------------------------------------------------------------------------------------------------------------------------------------------------------------------------------------------------------------------------------------------------------------------------------------------------------------------------------------------------------------------------------------------------------------------------------------------------------------------------------------------------|-----------------------------------------------------------------------------------------------------------------------------------------------|
| <b>Exhaustion of stress handling reserve<br/>(1000 mg/kg/day, Wk 8-13)</b> | <ul style="list-style-type: none"> <li>• 186 genes with changed expression (Wk 13)</li> <li>• ↑ Cell cycle: Cdkn1a, Gdf15, Ccng1, Cdk1, Ccnb2, Trp53inp1, Btg2</li> <li>• ↑ p53 pathway: Gdf15, Mdm2, Ephx1, Mki67, Nek6</li> <li>• ↑ Cell adhesion, cytoskeleton structure: Tubb2a, Ckap2, Nef1, Gdf15, Mybpc2</li> <li>• ↑ Fibrosis, cystogenesis: C3, Sulf2, Ltbp2, Col19a1</li> <li>• ↑ Oxidative stress and renal injury: Ephx1, Aldh1a1, Aldh1a7, Nqo1, Lcn2, Havcr1, Ltbp2, Mki67</li> </ul> | <ul style="list-style-type: none"> <li>• 16 genes with changed expression (Wk 13)</li> <li>• ↑ Aldh1a7: Fold change less than male</li> </ul> |
|                                                                            | <ul style="list-style-type: none"> <li>• No notable changes in DNA damage/repair pathway genes</li> </ul>                                                                                                                                                                                                                                                                                                                                                                                           |                                                                                                                                               |
